# Supplementary material
Source: PubMed Central journal article supplement (PMC3624939)

## **Supplemental Materials and Methods**

### **1. HBMEC culture**

Primary human brain microvascular endothelial cells (HBMEC) obtained from Dr. Honghong Yao (University of Nebraska, Omaha, NE) were cultured in RPMI 1640 medium containing 10% heat-inactivated fetal bovine serum, 10% Nu-Serum, 2 mM glutamine, 1 mM pyruvate, penicillin (100 U/ml), streptomycin (100 µg/ml), 1% nonessential amino acids, and 1% vitamins.<sup>52</sup> HBMECs were treated with treated with LyoVec or PolyI:C for 16 h. The medium was removed and cells were washed three times with PBS. After additon of fresh medium, cells were cultured to 48 h post-treatment and then the culture supernatants were collected and cells were lysed for RNA extraction in Tri-reagent.

### **2. HMVEC-L culture**

Human Lymphatic Microvascular Endothelial Cells, Lung-Derived (HMVEC-L) were purchased from Lonza. HMVEC-L were cultured in microvascular endothelial cell growth medium-2 (EGM2-MV BulletKit; Lonza) according to the supplier's recommendations. HMVEC-L were plated in multiwell plates for overnight seeding and then treated with LyoVec or PolyI:C for 16 h. The medium was removed and cells were washed three times with PBS. After additon of fresh medium, cells were cultured to 48 h post-treatment and then the culture supernatants were collected and cells were lysed for RNA extraction in Tri-reagent.

Supplemental Figure 1

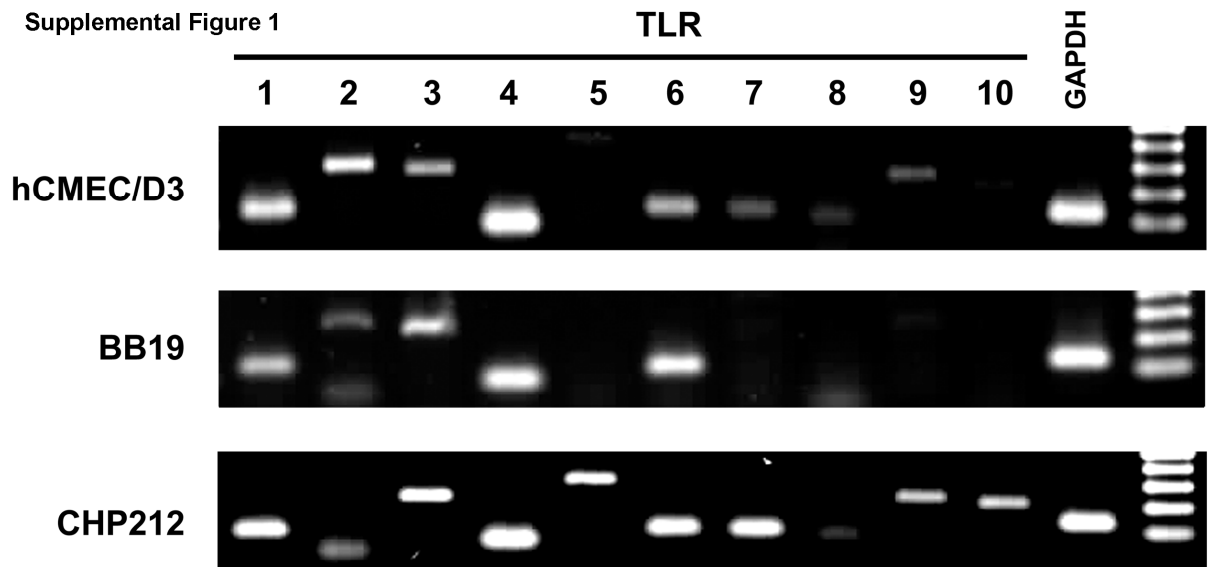

Supplemental Figure 2

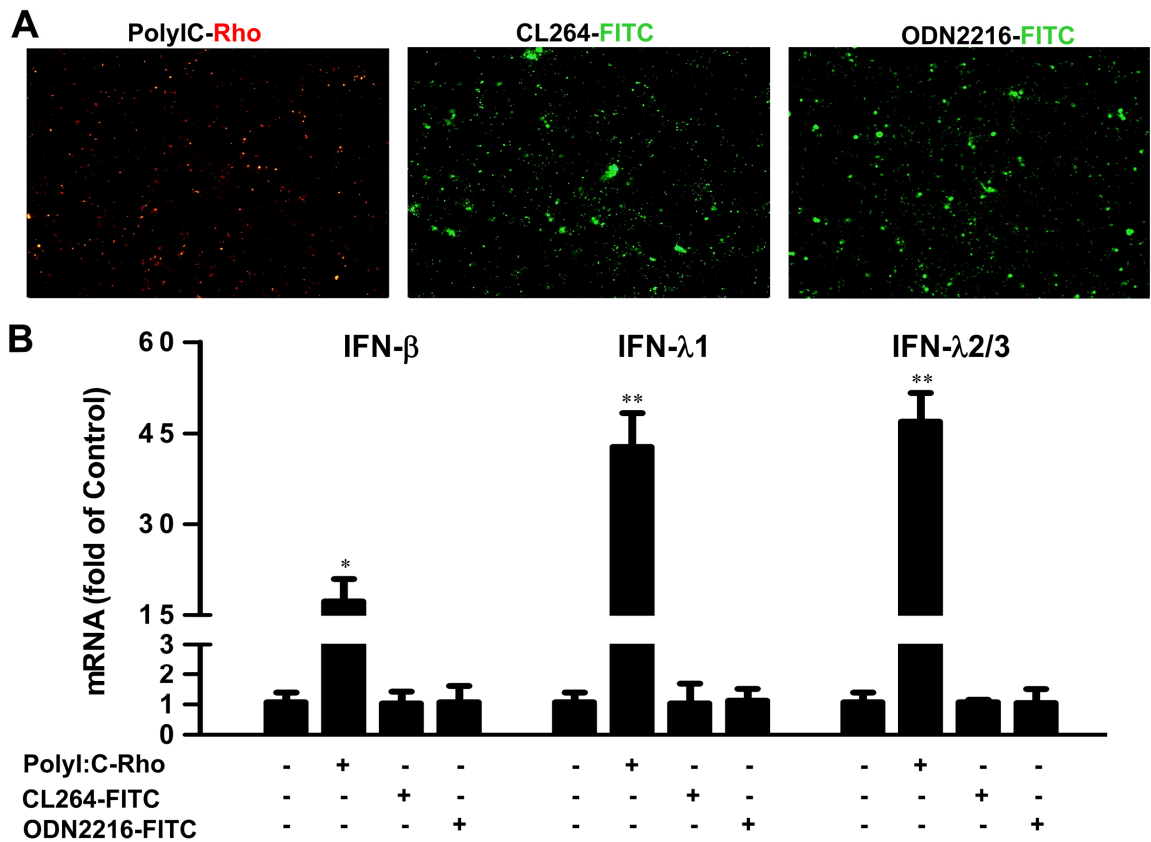

Supplemental Figure 3

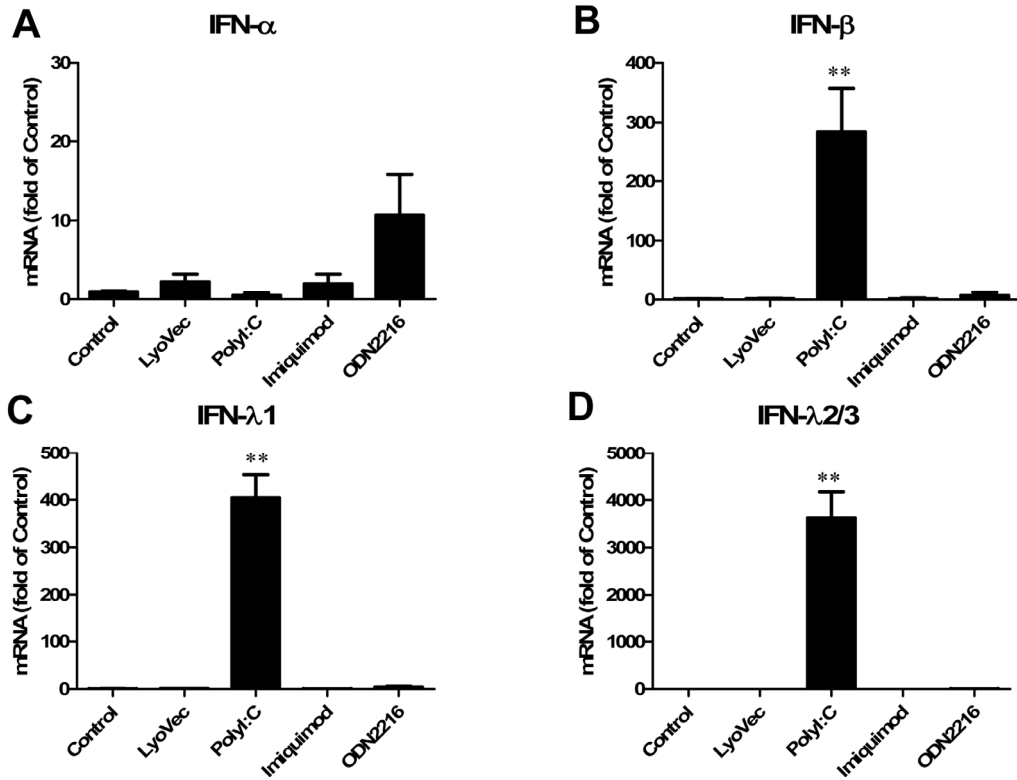

Supplemental Figure 4

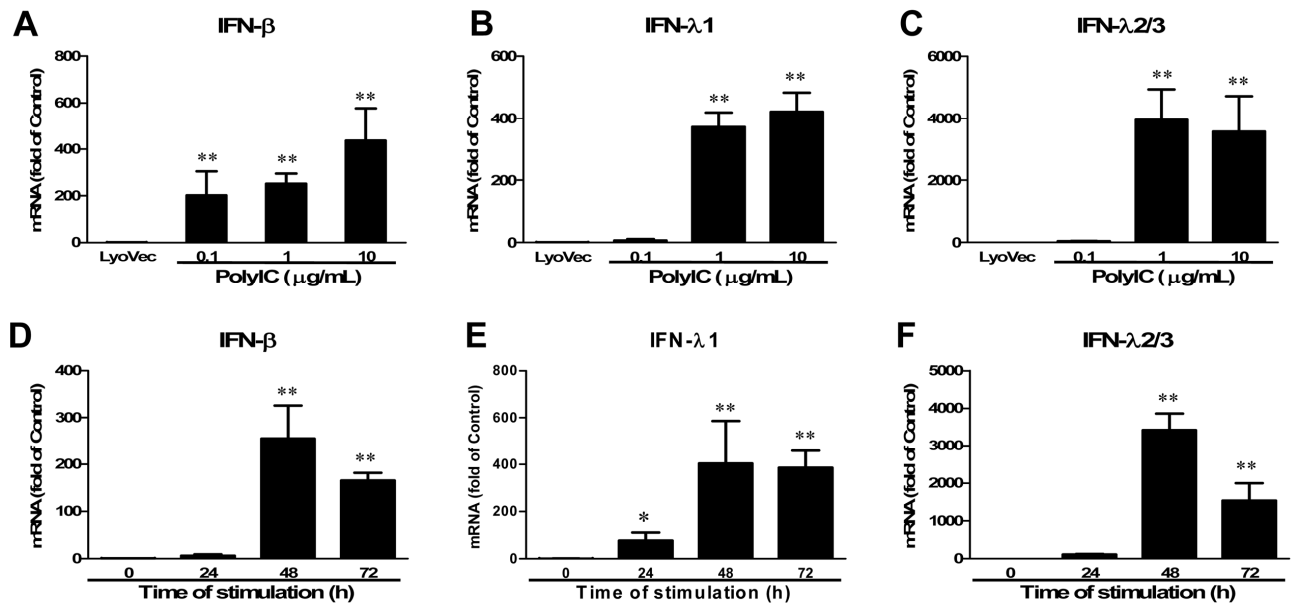

Supplemental Figure 5

**A** HIV GAG gene Expression  
(Intracellular)

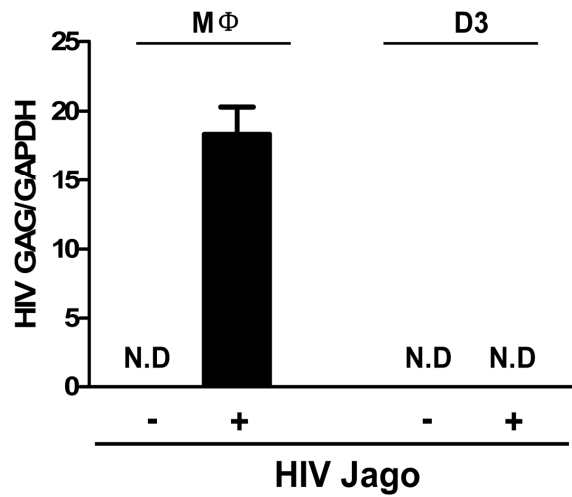

**B** HIV RT Activity  
(Extracellular)

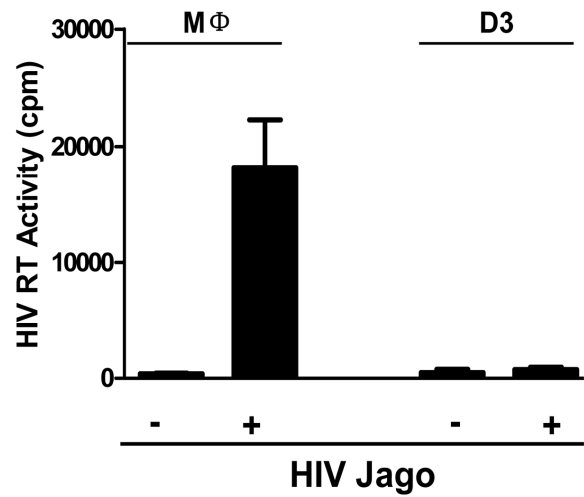

Supplemental Figure 6

Primary macrophages of 4 donors

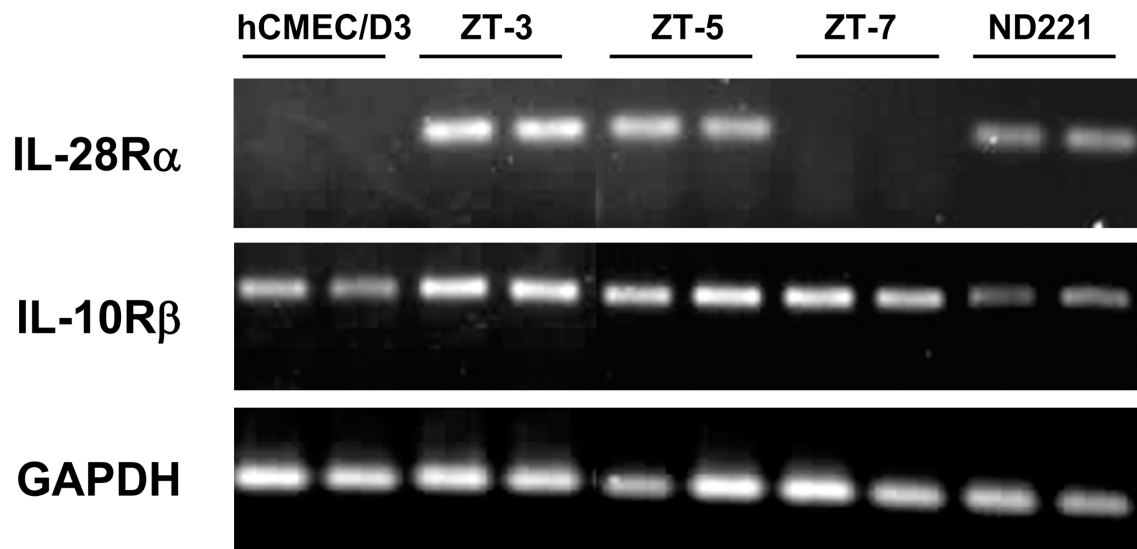

**Supplemental Figure 7**

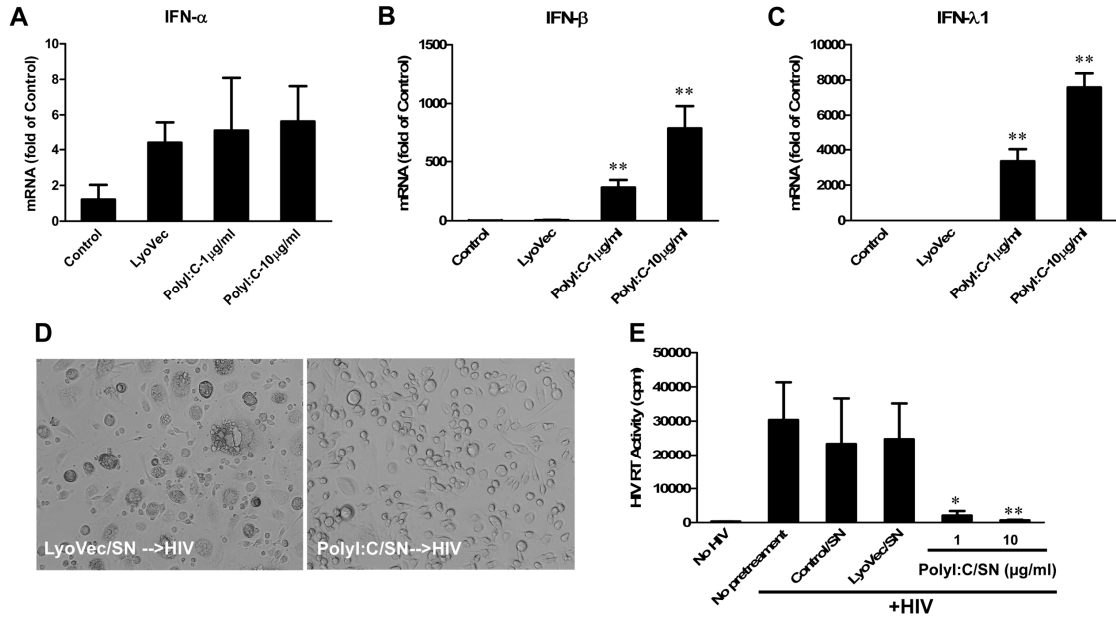

Supplement: supp_blood-2012-08-450353_blood-2012-08-450353-1.pdf [file supp_blood-2012-08-450353_blood-2012-08-450353-1.pdf]
